# Supplementary material for: Micellar drug delivery vehicles formed from amphiphilic block copolymers bearing photo-cross-linkable cyclopentenone side groups
Source: Royal Society of Chemistry journal article supplement (doi:10.1039/d2py00631f), 2022-01-01
Supplement: d2py00631f1.pdf [file d2py00631f1.pdf]

# SUPPORTING INFORMATION FOR: Micellar Drug Delivery Vehicles formed from Amphiphilic Block Copolymers Bearing Photo-Cross-linkable Cyclopentenone Side Groups

Jules Stouten, Nick Sijstermans, Joanna Babilotte, Andrij Pich, Lorenzo Moroni, Katrien V.

Bernaerts

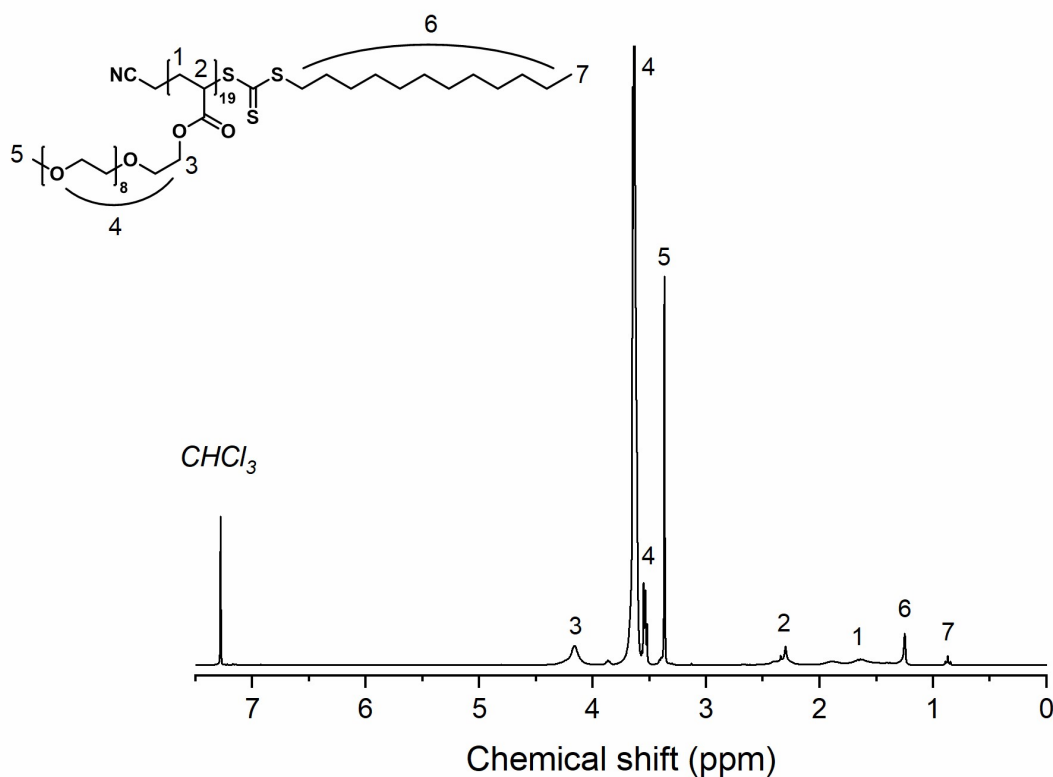

Figure S1. Assigned <sup>1</sup>H NMR spectrum of POEGA<sub>19</sub> macro RAFT agent.

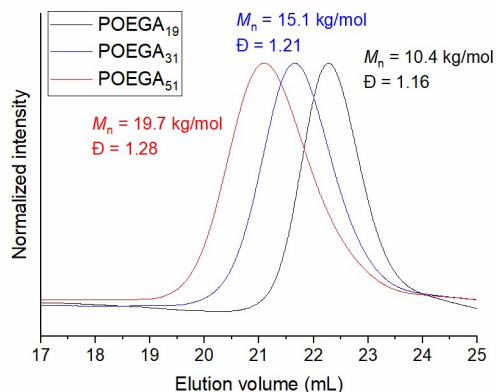

Figure S2. Overlay of the GPC traces of POEGA macro-RAFT agents using DMF containing 6 g/L AcOH and 0.035 mol/L LiCl as the eluent and a refractive index detector.

Table S1. GPC results of the synthesized block copolymers.

| Polymer                               | $M_{n, GPC}$<br>(g/mol) | $\bar{D}$ |
|---------------------------------------|-------------------------|-----------|
| POEGA <sub>19</sub>                   | 10.4                    | 1.16      |
| POEGA <sub>19</sub> -HB <sub>16</sub> | 5.8                     | 1.61      |
| POEGA <sub>19</sub> -HB <sub>37</sub> | 5.6                     | 1.63      |
| POEGA <sub>19</sub> -HB <sub>50</sub> | 6.8                     | 1.46      |
| POEGA <sub>31</sub>                   | 15.1                    | 1.21      |
| POEGA <sub>31</sub> -HB <sub>17</sub> | 8.5                     | 1.84      |
| POEGA <sub>31</sub> -HB <sub>38</sub> | 10.1                    | 2.27      |
| POEGA <sub>31</sub> -HB <sub>49</sub> | 9.4                     | 1.59      |
| POEGA <sub>51</sub>                   | 19.7                    | 1.28      |
| POEGA <sub>51</sub> -HB <sub>15</sub> | 14.9                    | 1.71      |
| POEGA <sub>51</sub> -HB <sub>32</sub> | 10.7                    | 2.07      |
| POEGA <sub>51</sub> -HB <sub>47</sub> | 13.8                    | 1.96      |

The eluent that was used was DMF containing 6 g/L AcOH and 0.035 mol/L LiCl. Molecular weights are given relative to poly(methyl methacrylate) standards using a refractive index detector.

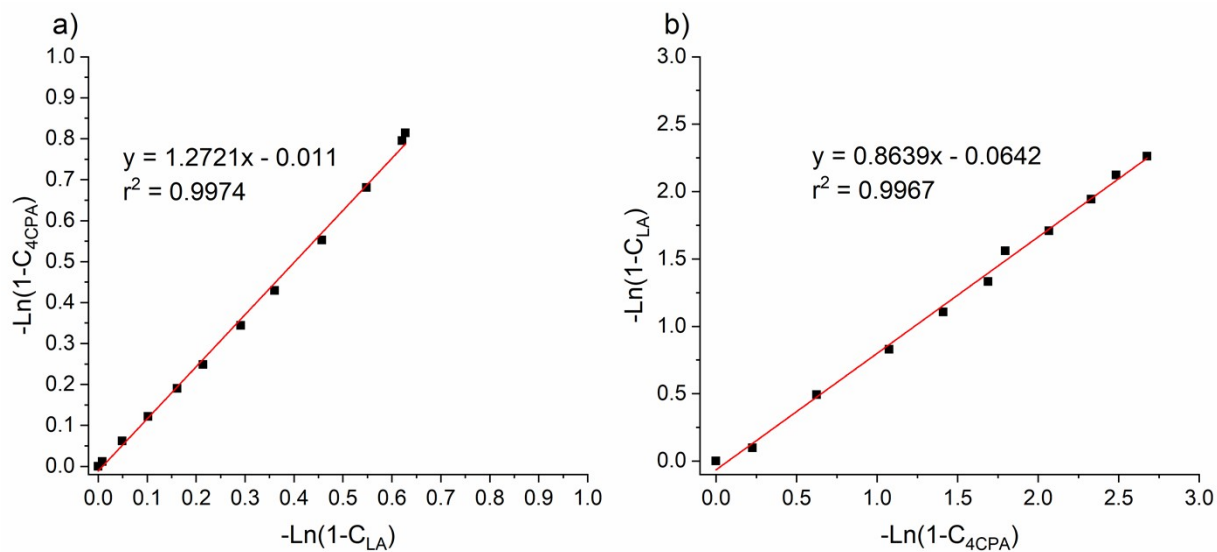

Figure S3. Jaacks plots of the copolymerization of 4CPA with LA. a) Excess 4CPA and b) excess LA.

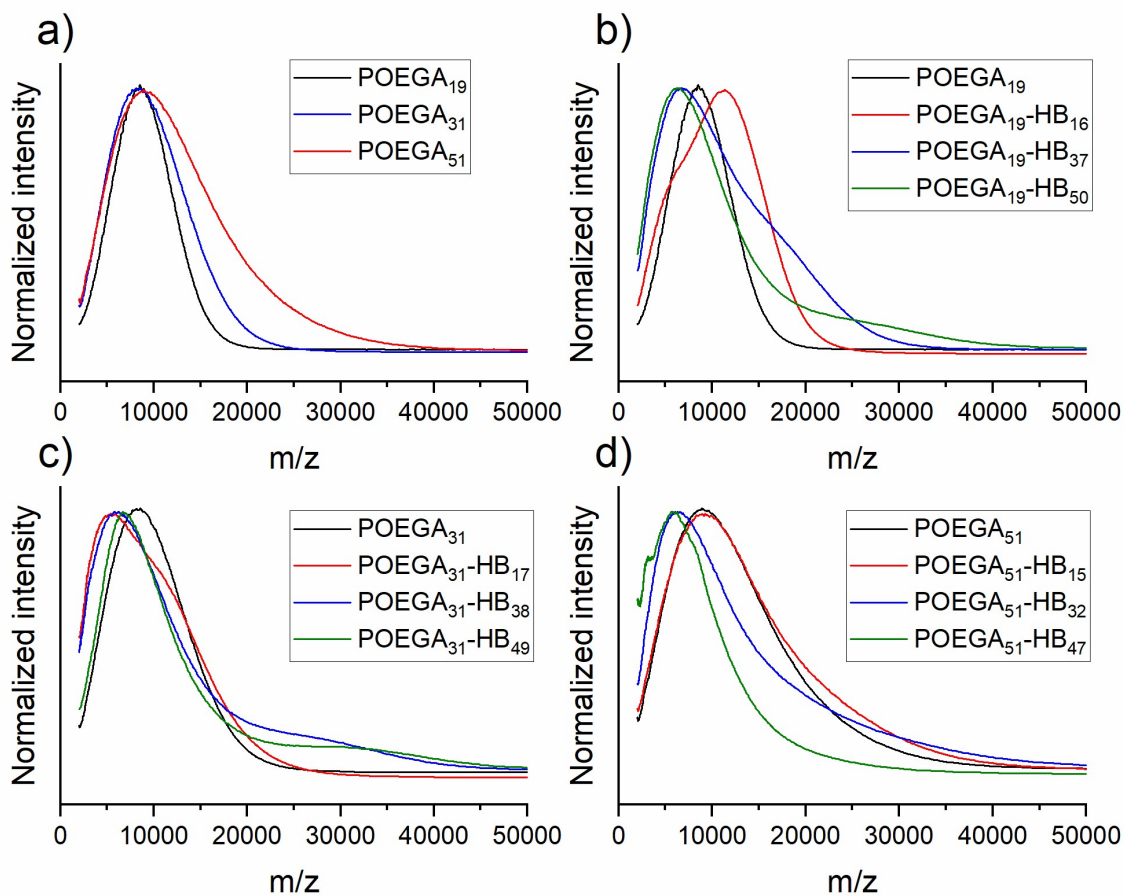

Figure S4. MALDI-ToF-MS spectra of a) POEGA macro-RAFT agents, b) POEGA<sub>19</sub> block copolymers, c) POEGA<sub>31</sub> block copolymers, and d) POEGA<sub>51</sub> block copolymers.

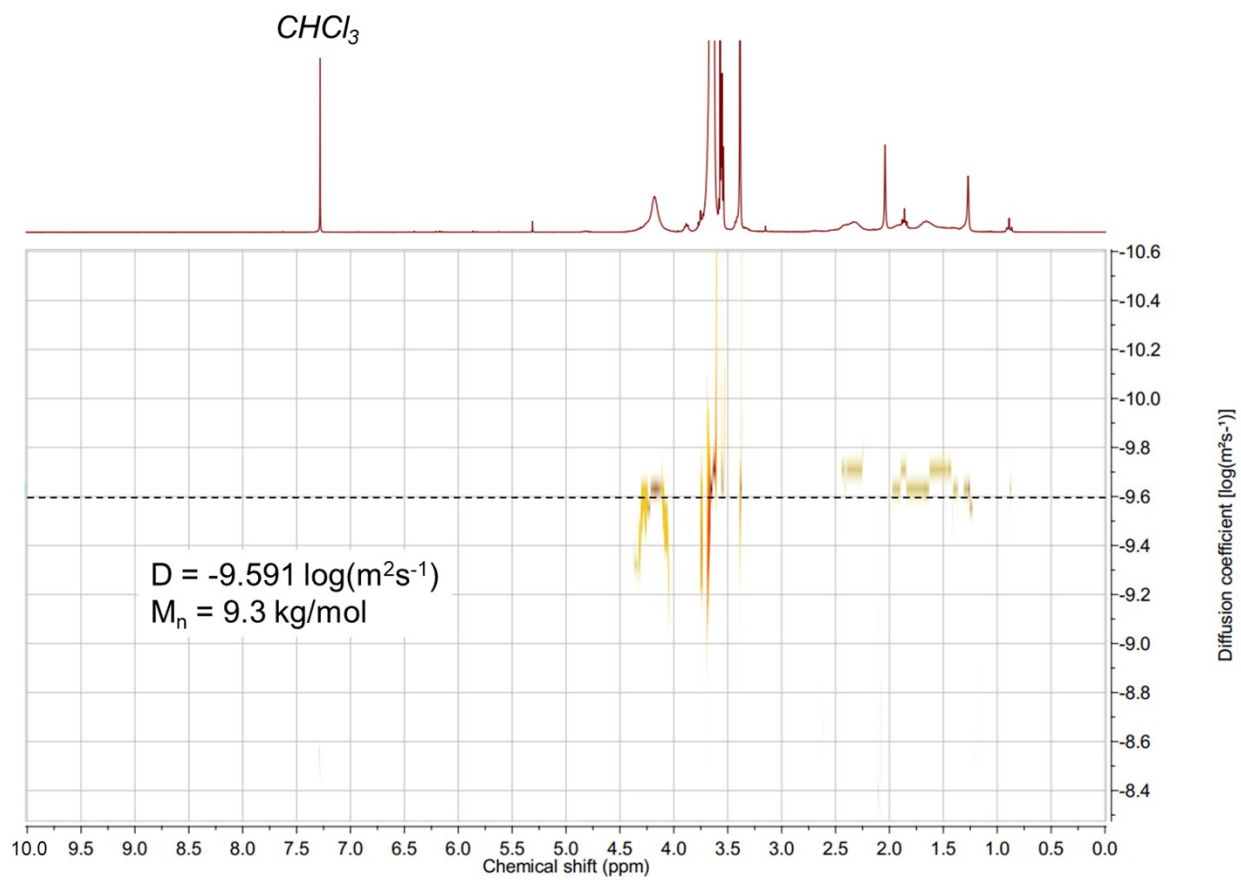

Figure S5. DOSY spectrum of POEGA<sub>19</sub>.

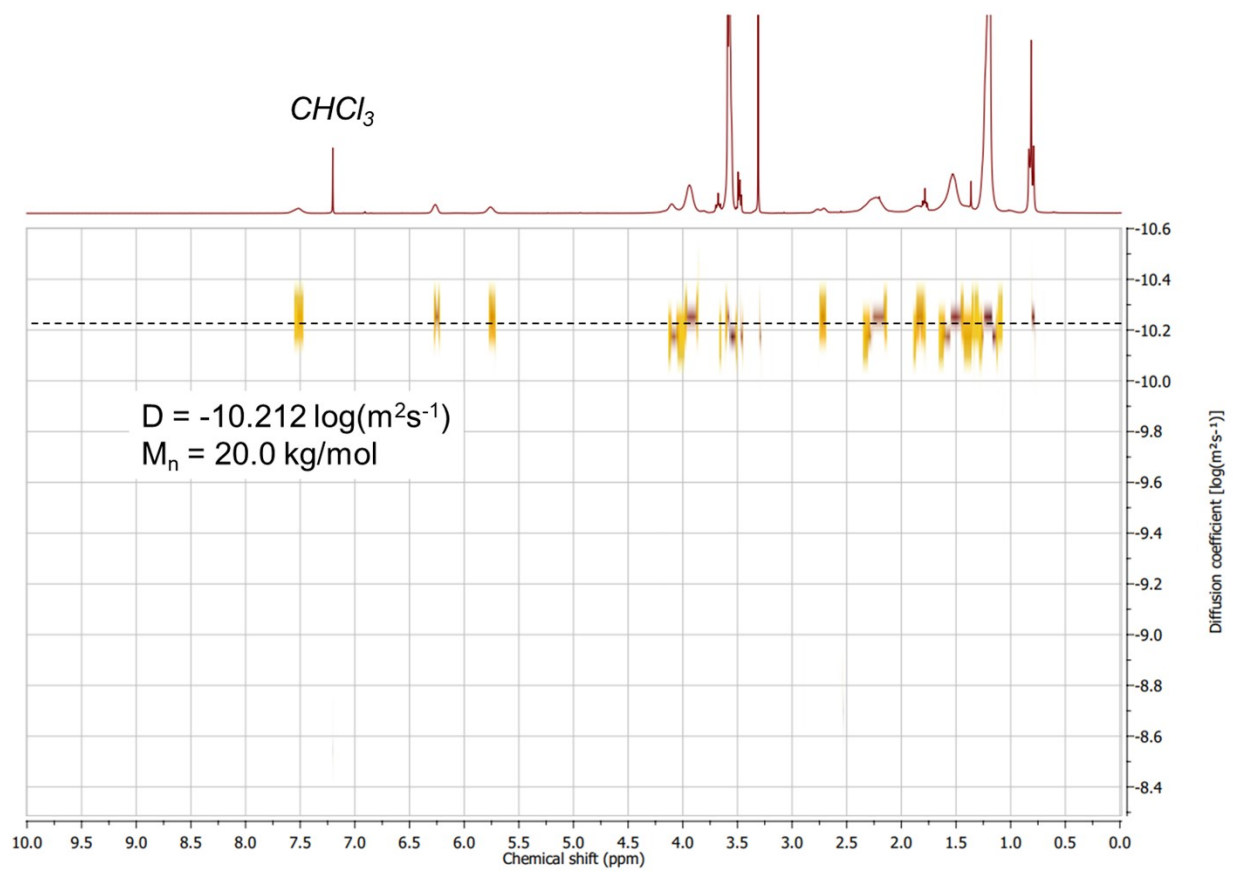

Figure S6. DOSY spectrum of POEGA<sub>19</sub>-HB<sub>50</sub>.

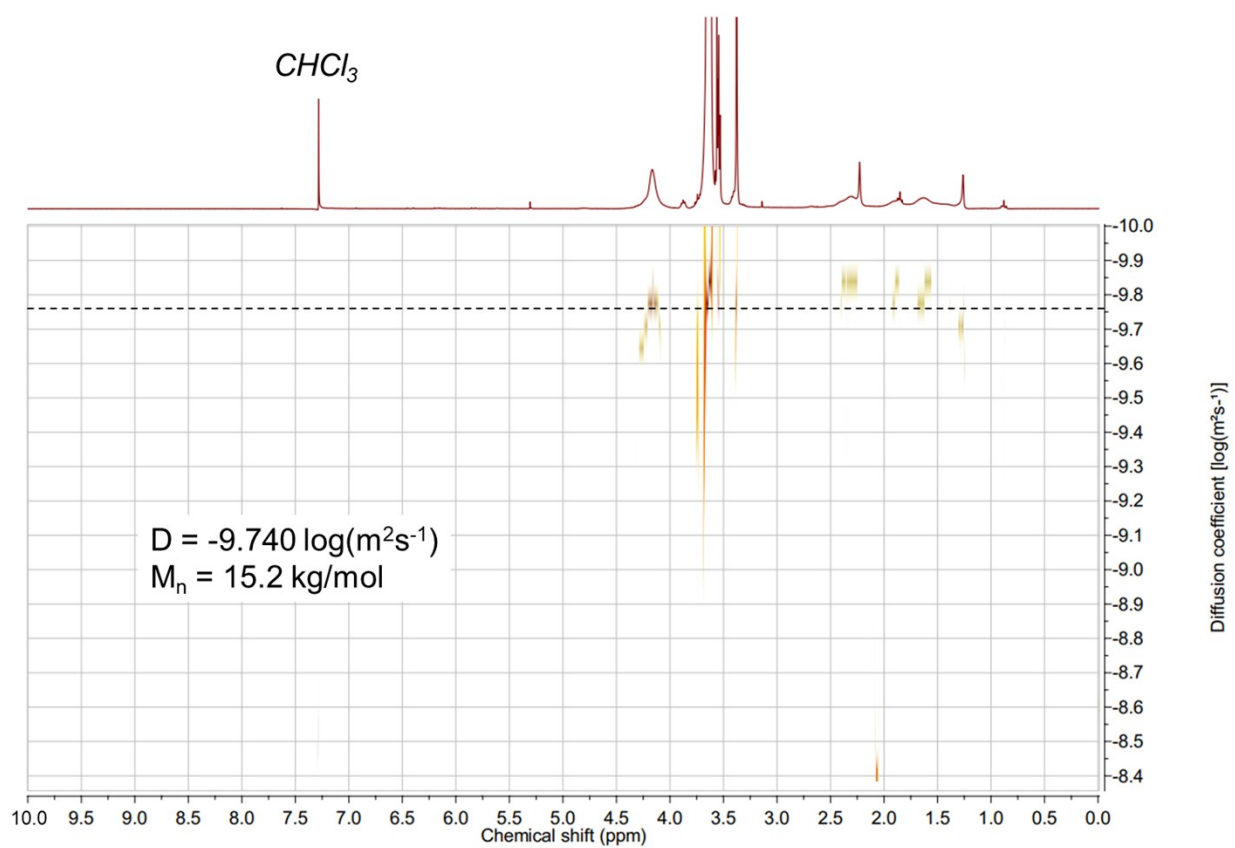

Figure S7. DOSY spectrum of POEGA<sub>31</sub>.

Table S2. Results of the surface tension measurements of POEGA macro-RAFT agents and block copolymers.

| Entry                                 | $M_{n,th}$ (kg/mol) | CAC (mM) | CAC (mg/L) |
|---------------------------------------|---------------------|----------|------------|
| POEGA <sub>19</sub>                   | 9.3                 | 0.0050   | 47         |
| POEGA <sub>31</sub>                   | 15.2                | 0.0028   | 43         |
| POEGA <sub>51</sub>                   | 24.3                | 0.0017   | 41         |
|                                       |                     |          |            |
| POEGA <sub>19</sub> -HB <sub>16</sub> | 12.8                | 0.0122   | 156        |
| POEGA <sub>19</sub> -HB <sub>37</sub> | 17.1                | 0.0120   | 205        |
| POEGA <sub>19</sub> -HB <sub>50</sub> | 20.0                | 0.0393   | 786        |
|                                       |                     |          |            |
| POEGA <sub>31</sub> -HB <sub>17</sub> | 18.9                | 0.0085   | 161        |
| POEGA <sub>31</sub> -HB <sub>38</sub> | 23.3                | 0.0076   | 177        |
| POEGA <sub>31</sub> -HB <sub>49</sub> | 25.7                | 0.0082   | 211        |
|                                       |                     |          |            |
| POEGA <sub>51</sub> -HB <sub>15</sub> | 27.6                | 0.0040   | 110        |
| POEGA <sub>51</sub> -HB <sub>32</sub> | 31.2                | 0.0036   | 112        |
| POEGA <sub>51</sub> -HB <sub>47</sub> | 34.5                | 0.0039   | 135        |

Table S3. DLS results for the prepared block-copolymers directly dissolved in water, and prepared via the solvent-switch method before dialysis (90/10 v/v% H<sub>2</sub>O/THF) and after dialysis (100% H<sub>2</sub>O).

| Entry                                 | Directly dissolved in H <sub>2</sub> O |                  |       | Prepared by solvent-exchange method |                  |       |                  |                  |       |
|---------------------------------------|----------------------------------------|------------------|-------|-------------------------------------|------------------|-------|------------------|------------------|-------|
|                                       | Peak 1 size (nm)                       | Peak 2 size (nm) | Đ     | Before dialysis                     |                  |       | After dialysis   |                  |       |
|                                       |                                        |                  |       | Peak 1 size (nm)                    | Peak 2 size (nm) | PDI   | Peak 1 size (nm) | Peak 2 size (nm) | Đ     |
| POEGA <sub>19</sub> -HB <sub>16</sub> | 99                                     | -                | 0.368 | 310                                 | -                | 0.215 | 161              | -                | 0.274 |
| POEGA <sub>19</sub> -HB <sub>37</sub> | 29                                     | 167              | 0.470 | 45                                  | -                | 0.554 | 27               | -                | 0.181 |
| POEGA <sub>19</sub> -HB <sub>50</sub> | 257                                    | -                | 0.396 | 63                                  | -                | 0.193 | 43               | -                | 0.250 |
| POEGA <sub>31</sub> -HB <sub>17</sub> | 104                                    | -                | 0.294 | 219                                 | -                | 0.210 | 88               | -                | 0.455 |
| POEGA <sub>31</sub> -HB <sub>38</sub> | 89                                     | 378              | 0.745 | 63                                  | -                | 0.258 | 40               | 192              | 0.341 |
| POEGA <sub>31</sub> -HB <sub>49</sub> | 67                                     | 813              | 0.703 | 47                                  | -                | 0.189 | 36               | -                | 0.220 |
| POEGA <sub>51</sub> -HB <sub>15</sub> | 61                                     | -                | 0.226 | 297                                 | -                | 0.236 | 149              | -                | 0.278 |
| POEGA <sub>51</sub> -HB <sub>32</sub> | 69                                     | 264              | 0.429 | 42                                  | 260              | 0.634 | 29               | 198              | 0.506 |
| POEGA <sub>51</sub> -HB <sub>47</sub> | 202                                    | -                | 0.375 | 66                                  | 600              | 0.309 | 50               | 286              | 0.355 |

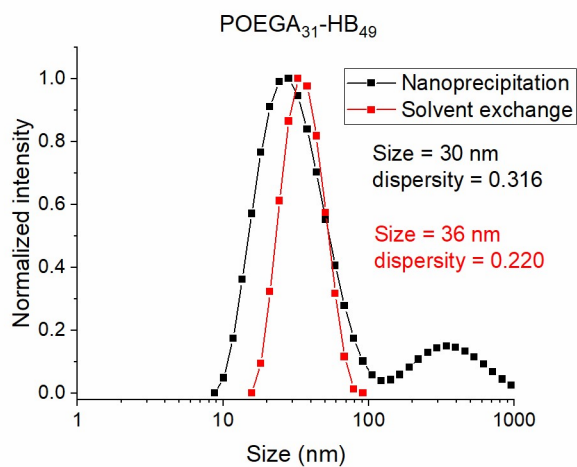

Figure S8. DLS results of POEGA<sub>31</sub>-HB<sub>49</sub> micelles obtained via solvent exchange and nanoprecipitation.

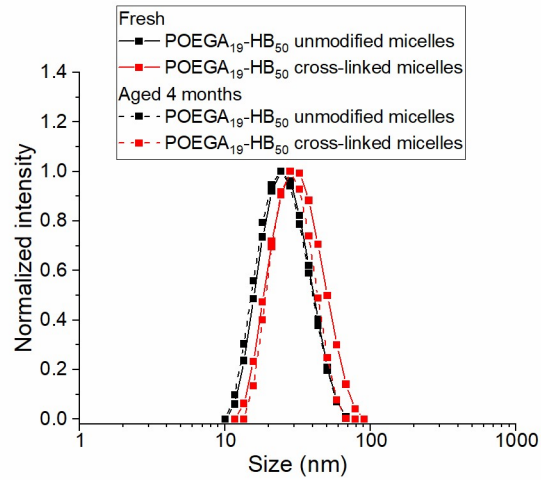

Figure S9. DLS results of unmodified micelles and cross-linked micelles obtained from block copolymer POEGA<sub>19</sub>-HB<sub>50</sub> directly after preparation and after 4 months storage.

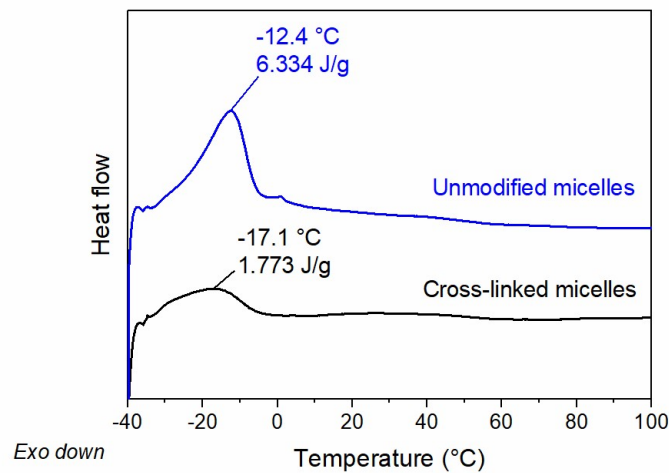

Figure S10. Overlay of the DSC traces of unmodified micelles (blue) and UV cross-linked micelles (black) of POEGA<sub>19</sub>-HB<sub>50</sub>.



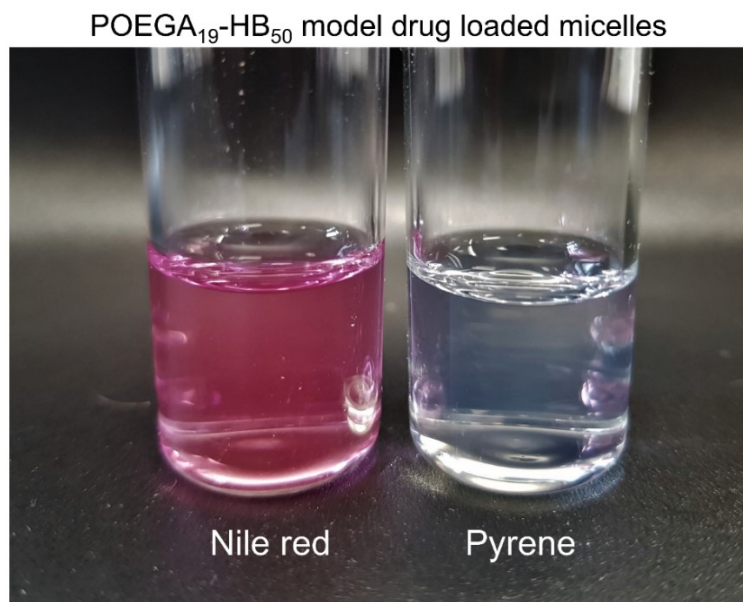

Figure S11. Photograph of Nile red and pyrene loaded micelles from block copolymer POEGA<sub>19</sub>-HB<sub>50</sub>.

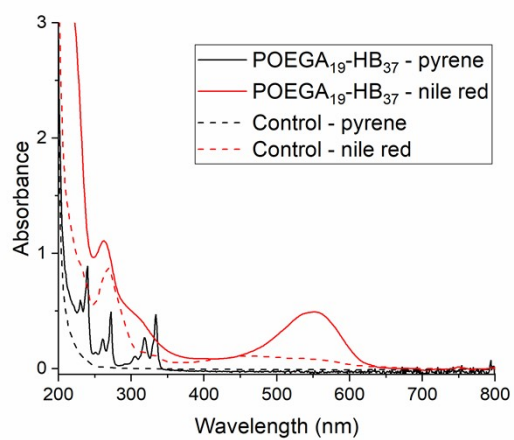

Figure S12. UV-Vis spectrum in methanol of pyrene and Nile red loaded micelles from POEGA<sub>19</sub>-HB<sub>37</sub>, and the control samples without block copolymer.

Table S4. Encapsulation efficiency for pyrene and Nile red.

| Block copolymer                       | EE (pyrene)<br>(%) | EE (Nile red)<br>(%) |
|---------------------------------------|--------------------|----------------------|
| POEGA <sub>19</sub> -HB <sub>16</sub> | 2.2                | 2.4                  |
| POEGA <sub>19</sub> -HB <sub>37</sub> | 3.6                | 2.2                  |
| POEGA <sub>19</sub> -HB <sub>50</sub> | 3.7                | 1.8                  |
| POEGA <sub>31</sub> -HB <sub>17</sub> | 1.4                | 1.8                  |
| POEGA <sub>31</sub> -HB <sub>38</sub> | 2.1                | 1.1                  |
| POEGA <sub>31</sub> -HB <sub>49</sub> | 2.5                | 1.1                  |
| POEGA <sub>51</sub> -HB <sub>15</sub> | 0.5                | 1.4                  |
| POEGA <sub>51</sub> -HB <sub>32</sub> | 0.9                | 2.1                  |
| POEGA <sub>51</sub> -HB <sub>47</sub> | 1.5                | 1.5                  |

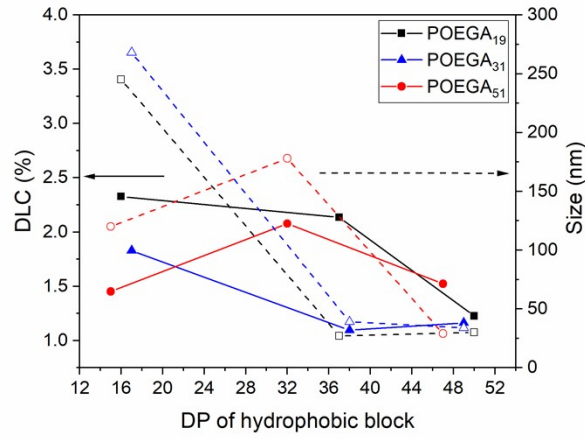

Figure S13. Investigation of the DLC and particle size in DLS of the Nile red loaded block copolymers as a function of the DP of hydrophobic block.

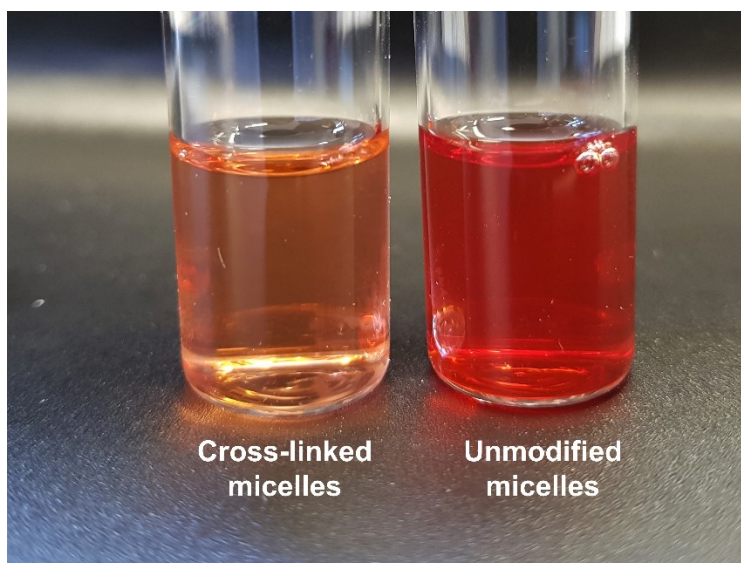

Figure S14. Photograph of the cross-linked and unmodified DOX loaded micelles from block copolymer POEGA<sub>19</sub>-HB<sub>50</sub>.

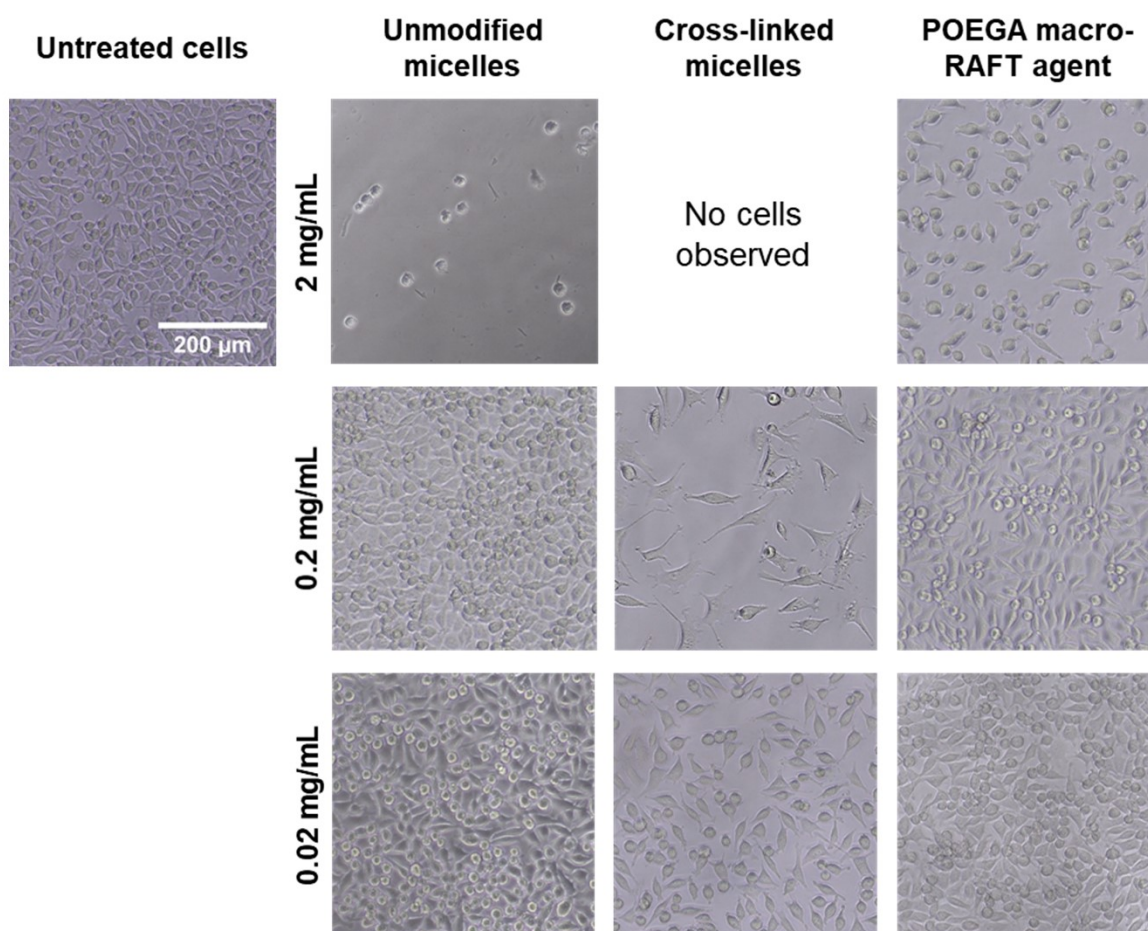

Figure S15. Microscope photographs of the L929 cell line incubated with unmodified micelles, cross-linked micelles and POEGA macro-RAFT agent at several concentrations for 72 hours.

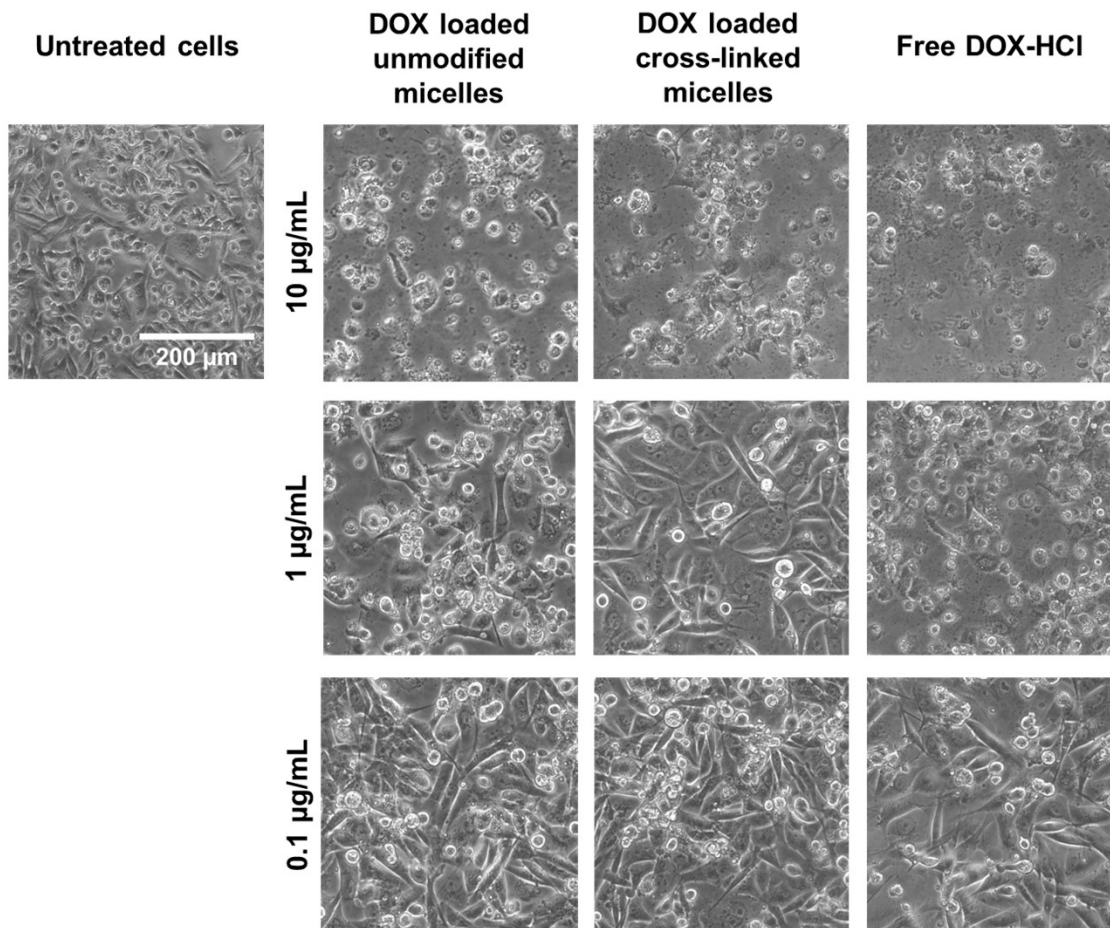

Figure S16. Microscope photographs of the MDA-MB-231 cell line incubated with DOX loaded unmodified micelles, cross-linked micelles and free DOX-HCl at several concentrations for 72 hours.
